# Supplementary material
Source: publisher figshare collection journal article supplement (https://karger.figshare.com/ndownloader/files/13059431)
Supplement: Supplementary file 1 [file 13059431]

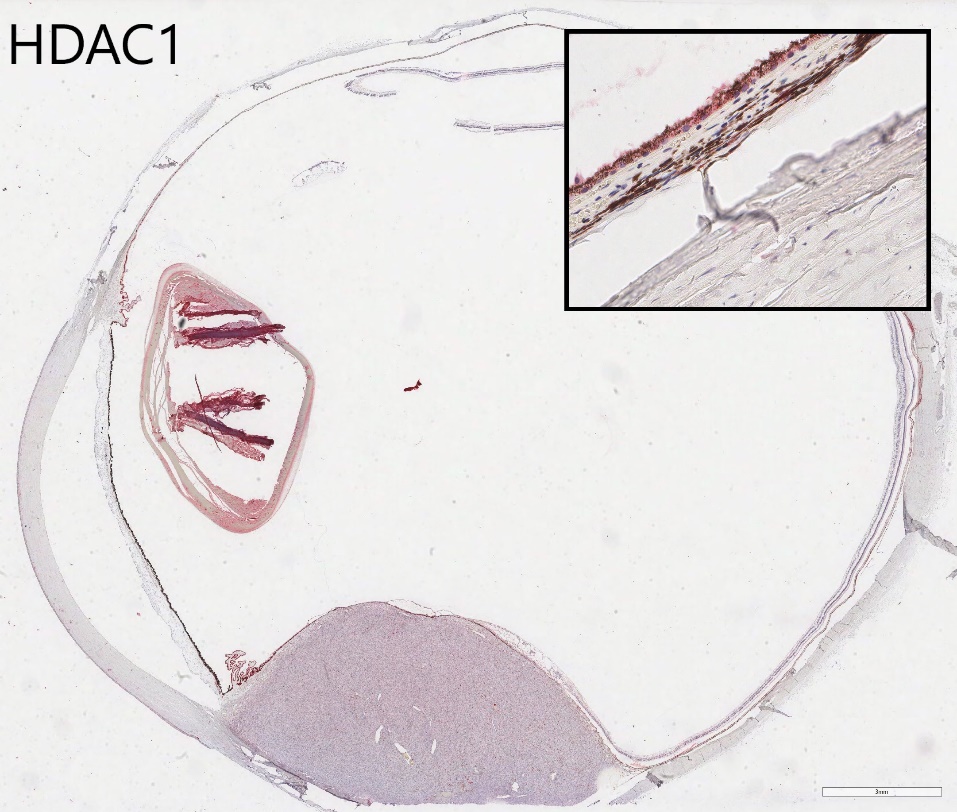


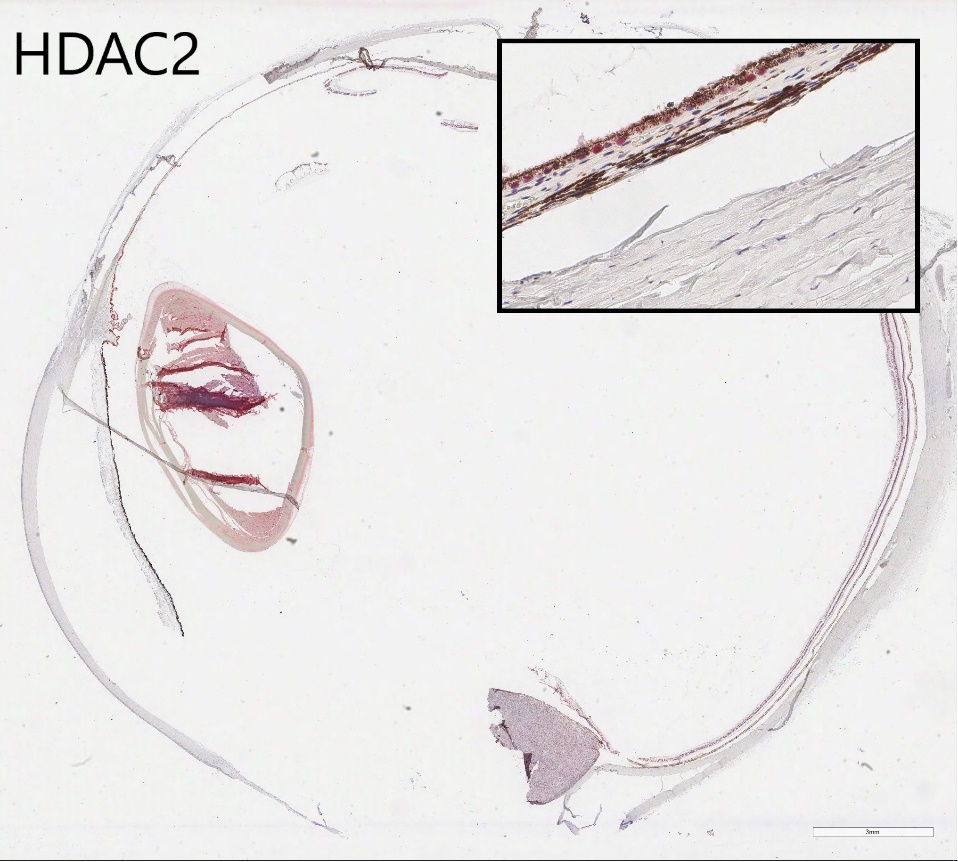


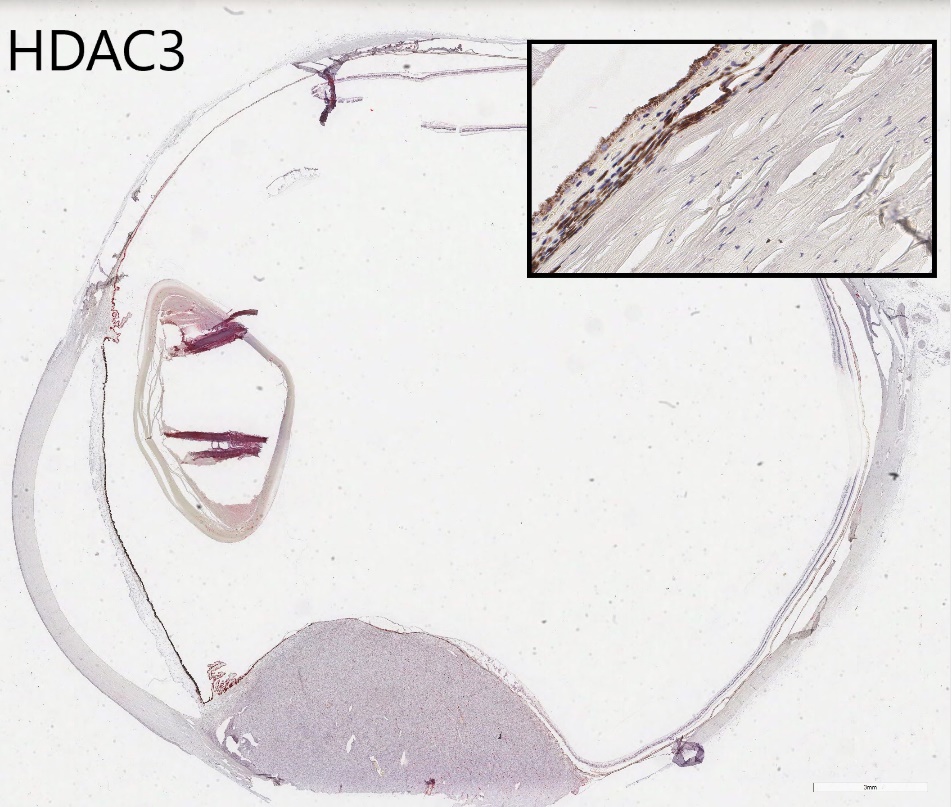


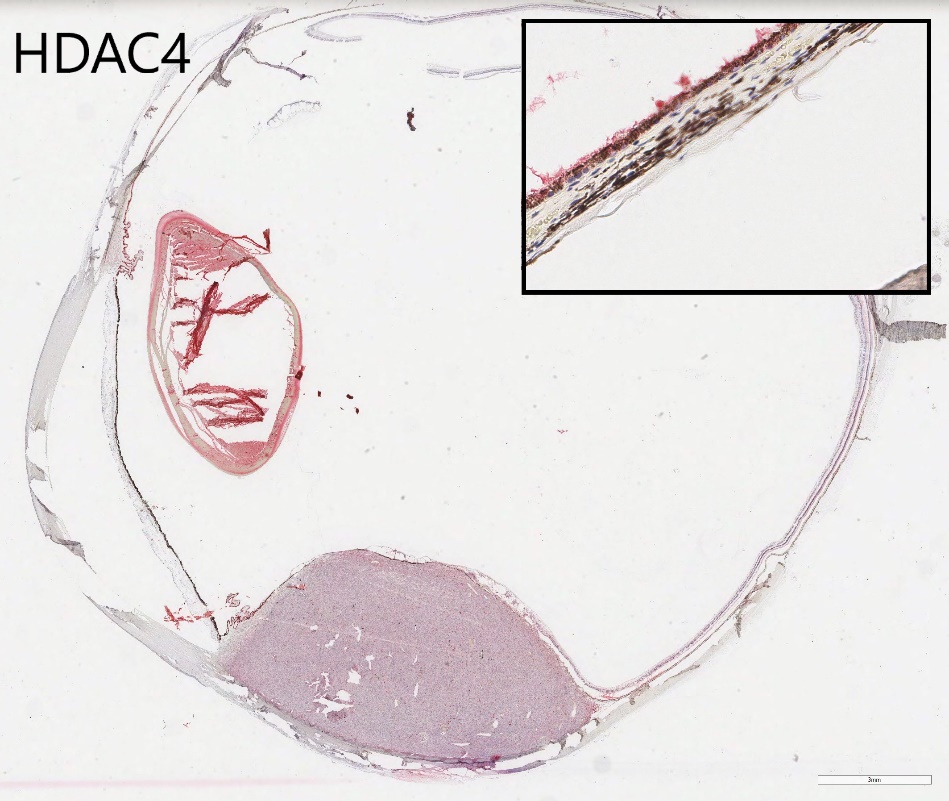


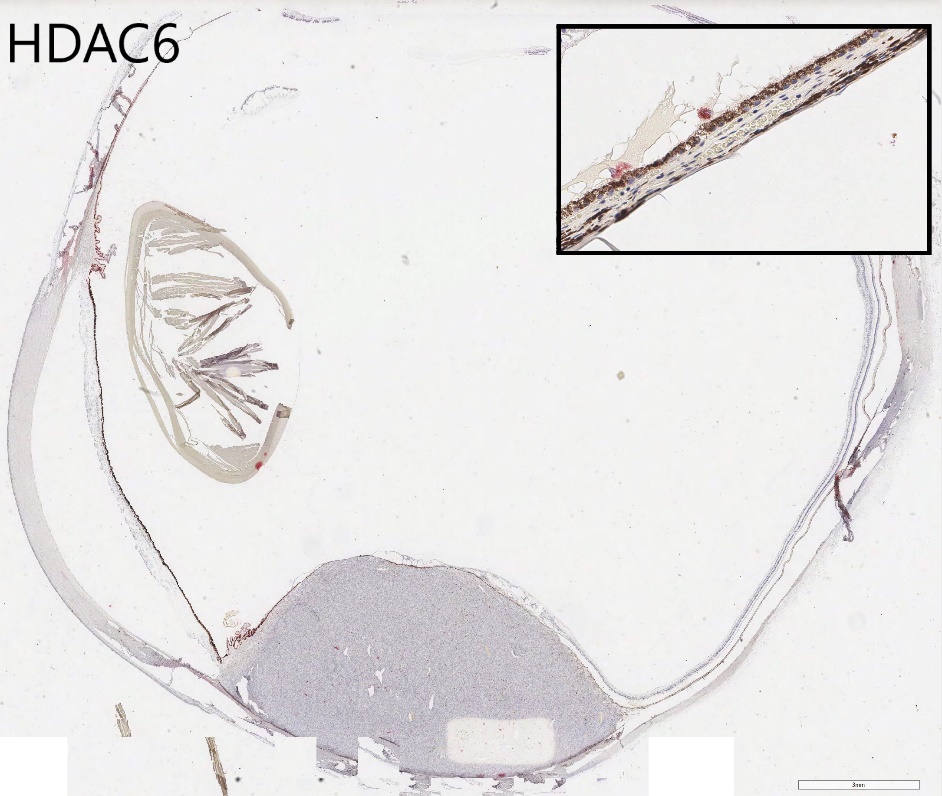


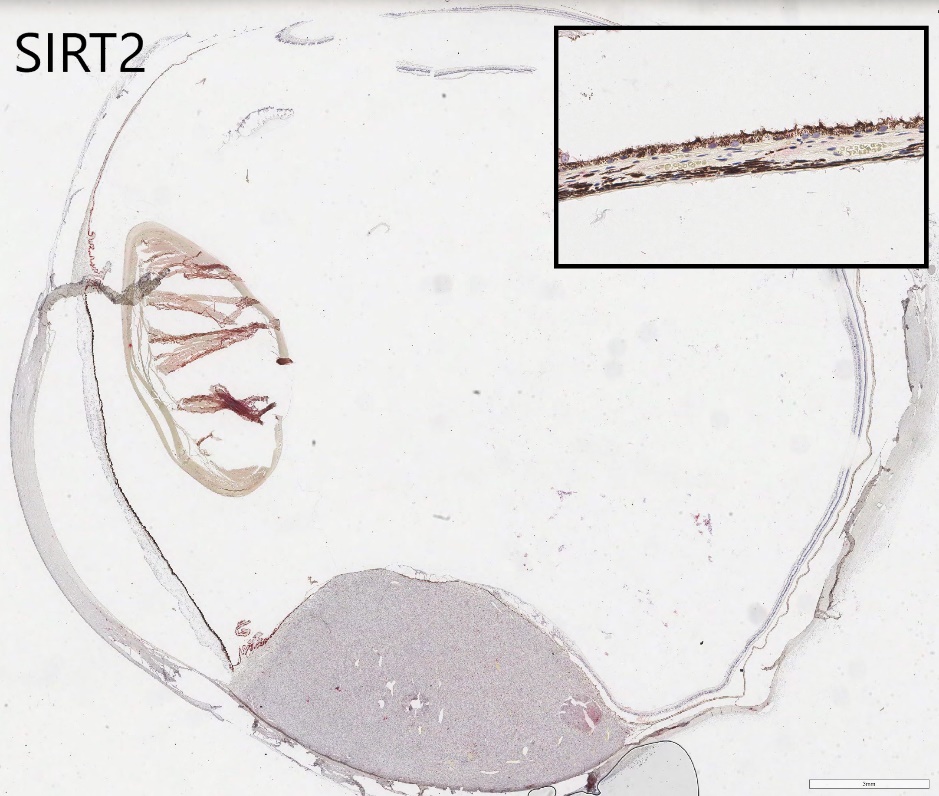


**Supplementary Figure 1** – Photomicrographs of global HDAC staining of uveal melanoma eyes for HDACs 1, 2, 3, 4, 6 and SIRT2. Insert at higher magnification of nearby choroid demonstrating melanocyte staining as a control. Scale bar 3mm. (Fast Red chromogen; haematoxylin counterstain).
